# Supplementary material for: Synthesis of Some Novel Fluorinated/Nonfluorinated α-Amino Acids, Bearing 3-Thioxo-5-oxo-1,2,4-triazin-6-yl and Steroidal Moieties, and Evaluation of Their Amylolytic Effects against Some Fungi, Part-II
Source: Hindawi journal article supplement (doi:10.1155/2020/9645949), 2020-07-23
Supplement: f1 [file 9645949.f1.docx]

**Figure I . A Graphical Abstract of All Newely synthesized Compounds 4a,4b, 5a &5b.**
